# Supplementary material
Source: Research Square preprint supplement (doi:10.21203/rs.3.rs-9121359/v1)
Supplement: Supplementary file 1 [file 99633ca488e78f8bdd713a78.docx]

**Table 1.** Baseline demographic and clinical characteristics of patients after propensity score matching

| **Variable** | **Non-rLDH (n=53)** | **rLDH (n=53)** | **P value** |
| --- | --- | --- | --- |
| Age (years) | 45.28 ± 11.34 | 47.19 ± 10.92 | 0.38 |
| Male, n (%) | 29 (54.7) | 31 (58.5) | 0.69 |
| BMI (kg/m²) | 24.12 ± 3.01 | 24.39 ± 3.26 | 0.81 |
| Smoking, n (%) | 18 (34.0) | 21 (39.6) | 0.54 |
| Diabetes, n (%) | 6 (11.3) | 8 (15.1) | 0.56 |
| Follow-up (months) | 24.9 ± 6.3 | 25.4 ± 5.8 | 0.62 |

**Table 2.** Comparison of spinopelvic parameters and segmental degenerative features between the rLDH and non-rLDH groups

| **Variable** | **Non-rLDH (n=53)** | **rLDH (n=53)** | **P value** |
| --- | --- | --- | --- |
| PI (°) | 46.21 ± 7.88 | 47.06 ± 7.42 | 0.56 |
| PT (°) | 17.38 ± 6.04 | 18.02 ± 5.91 | 0.59 |
| SS (°) | 28.83 ± 6.72 | 29.04 ± 6.51 | 0.87 |
| LL (°) | 43.55 ± 9.14 | 42.09 ± 8.76 | 0.41 |
| PI–LL (°) | 2.66 ± 7.81 | 5.92 ± 8.36 | **0.010** |
| DH (mm) | 7.84 ± 1.21 | 9.36 ± 1.48 | **<0.001** |
| ROM (°) | 9.18 ± 2.41 | 12.94 ± 3.27 | **<0.001** |
| Facet degeneration | 2.11 ± 0.63 | 2.69 ± 0.71 | **0.003** |
| Pfirrmann grade | 3.06 ± 0.74 | 3.81 ± 0.68 | **<0.001** |
| Modic change, n (%) | 4 (7.5) | 19 (35.8) | **0.001** |
| Segmental instability, n (%) | 6 (11.3) | 22 (41.5) | **0.001** |

**Table 3.** Univariate and multivariate logistic regression analyses for risk factors of recurrent lumbar disc herniation

| **Variable** | **Univariate OR**  **(95% CI)** | **P value** | **Multivariate OR**  **(95% CI)** | **P value** |
| --- | --- | --- | --- | --- |
| BMI | 1.14 (1.02–1.28) | 0.026 | 1.09 (0.95–1.25) | 0.22 |
| PI–LL | 1.07 (1.01–1.13) | 0.011 | 1.08 (1.01–1.14) | **0.015** |
| DH | 1.52 (1.28–1.81) | <0.001 | 1.50 (1.14–1.97) | **0.004** |
| ROM | 1.24 (1.14–1.35) | <0.001 | 1.12 (0.97–1.29) | 0.13 |
| Facet degeneration | 2.73 (1.39–5.36) | 0.004 | 6.00 (1.74–20.70) | **0.005** |
| Modic change | 6.85 (1.89–24.83) | 0.001 | 7.35 (1.55–34.86) | **0.012** |
| Instability | 5.56 (1.98–15.62) | 0.001 | 2.01 (0.61–6.64) | 0.25 |
| L4/5 level | 2.04 (0.99–4.21) | 0.053 | 4.08 (1.13–14.74) | **0.032** |

**Table 4.** Baseline covariate balance after propensity score matching

| **Covariate** | **Non-rLDH (n=53)** | **rLDH (n=53)** | **SMD** | **P value** |
| --- | --- | --- | --- | --- |
| Age (years) | 45.28 ± 11.34 | 47.19 ± 10.92 | 0.057 | 0.770 |
| Male, n (%) | 29 (54.7) | 27 (50.9) | 0.076 | 0.846 |
| BMI (kg/m²) | 24.12 ± 3.01 | 24.39 ± 3.26 | 0.069 | 0.818 |
| Surgical level L4/5, n (%) | 33 (62.3) | 31 (58.5) | 0.077 | 0.843 |

Values are presented as mean ± standard deviation or number (%). SMD, standardized mean difference; BMI, body mass index. An SMD < 0.1 was considered indicative of adequate covariate balance.
